# Supplementary material
Source: publisher site journal article supplement (https://www.dovepress.com/article/338788)
Supplement: Supplementary file 1 [file get_supplementary_file.php]

**Figure. S1**

**Figure. S2**

**Figure. S3**

| **Table. S1. Clinicopathological characteristics of PD Patients and Non-PD Patients of SEER database.** | | | | | | |
| --- | --- | --- | --- | --- | --- | --- |
| Patient Characteristics and Treatments | PD-Patients | | | Non-PD Patients | |  |
| n=444 | | | n=253496 | |  |
|  | No. (%) | | | No. (%) | | P(a) |
| **Age (mean)** | 59.39 | | | 60.29 | | 0.152(b) |
| **Race** |  | | |  | | <0.001 |
| White | 398 (89.6%) | | | 200935 (79.3%) | |  |
| Black | 0 (0%) | | | 28587 (11.3%) | |  |
| Other | 46 (10.4%) | | | 23974 (9.5%) | |  |
| **Sex** |  | | |  | | <0.001 |
| Female | 421 (94.8%) | | | 251719 (99.3%) | |  |
| Male | 23 (5.2%) | | | 1777 (0.7%) | |  |
| **Grade** |  | | |  | | <0.001 |
| 1 | 25 (5.6%) | | | 57818 (22.8%) | |  |
| 2 | 156 (35.1%) | | | 111571 (44.0%) | |  |
| 3 | 260 (58.6%) | | | 83410 (32.9%) | |  |
| Unknown | 3 (0.7%) | | | 697 (0.3%) | |  |
| **Tumor size(cm)** |  | | |  | | <0.001 |
| <2 | 221 (49.8%) | | | 147992 (58.4%) | |  |
| ≥2 | 221 (49.8%) | | | 105344 (41.6%) | |  |
| Unknown | 2 (0.5%) | | | 160 (0.1%) | |  |
| **Lymph node metastasis (for IDC)** |  | | |  | | <0.001 |
| Yes | 221 (49.8%) | | | 83480 (32.9%) | |  |
| No | 223 (50.2%) | | | 170016 (67.1%) | |  |
| **Metastasis** |  | | |  | | 0.097 |
| No | 420 (94.6%) | | | 243629 (96.1%) | |  |
| Yes | 24 (5.4%) | | | 9837 (3.9%) | |  |
| **ER** |  | | |  | | <0.001 |
| Negative | 168 (37.8%) | | | 42968 (17.0%) | |  |
| Positive | 276 (62.2%) | | | 210453 (83.0%) | |  |
| **PR** |  | | |  | | <0.001 |
| Negative | 240 (54.1%) | | | 68544 (27.0%) | |  |
| Positive | 204 (45.9%) | | | 184952 (73.0%) | |  |
| **HER-2** |  | | |  | | <0.001 |
| Negative | 181 (40.8%) | | | 214594 (84.7%) | |  |
| Positive | 263 (59.2%) | | | 38902 (15.3%) | |  |
| **M-Bone** |  | | |  | | 0.554 |
| No | 431 (97.1%) | | | 247185 (97.5%) | |  |
| Yes | 13 (2.9%) | | | 6311 (2.5%) | |  |
| **M-liver** |  | | |  | | 0.436 |
| No | 438 (98.6%) | | | 250997 (99.0%) | |  |
| Yes | 6 (1.4%) | | | 2499 (1.0%) | |  |
| **M-lung** |  | | |  | | <0.001 |
| No | 430 (96.8%) | | | 250352 (98.8%) | |  |
| Yes | 14 (3.2%) | | | 2993 (1.2%) | |  |
| **M-brain** |  | | |  | | 0.289 |
| No | 444 (100.0%) | | | 252856 (99.7%) | |  |
| Yes | 0 (0.0%) | | | 640 (0.3%) | |  |
| Abbreviations: PD: Paget's Disease; ER: Estrogen Receptor; PR: Progesterone Receptor; HER-2: Human Epidermal Growth Factor Receptor-2; IDC: Invasive Ductal Carcinoma; M: Metastasis. | | | | | | |
| (a): Pearson Chi-square tests between PD Group and Non-PD Group. | | | | | | |
| (b): T tests were used to compare age between PD Group And Non-PD Group. | | | | | |  |
| **Table. S2. Clinicopathological characteristics of PD Patients in FUSCC and SEER database.** | | | | | | |
|  | | FUSCC | SEER | |  | |
| Patient Characteristics and Treatments | | n=333 | n=444 | |  | |
|  | | No. (%) | No. (%) | | P(b) | |
| **Age (mean)** | | 51.68 | 59.39 | | <0.001(c) | |
| **Grade** | |  |  | | <0.001 | |
| 1 | | 1 (0.3%) | 25 (5.6%) | |  | |
| 2 | | 72 (21.6%) | 156 (35.1%) | |  | |
| 3 | | 242 (72.7%) | 260 (58.6%) | |  | |
| Unknown | | 18 (5.4%) | 3 (0.7%) | |  | |
| **Tumor size(cm)** | |  |  | | 0.033 | |
| <2 | | 150 (45.0%) | 221 (49.8%) | |  | |
| ≥2 | | 175 (52.6%) | 221 (49.8%) | |  | |
| Unknown | | 8 (2.4%) | 2 (0.5%) | |  | |
| **Lymph node metastasis (for IDC)** | |  |  | | 0.001 | |
| Yes | | 132 (39.6%) | 223 (50.2%) | |  | |
| No | | 197 (59.2%) | 221 (49.8%) | |  | |
| Unknown | | 4 (1.2%) | 0 (0.0%) | |  | |
| **HR(a)** | |  |  | | <0.001 | |
| Negative | | 220 (66.1%) | 168 (37.8%) | |  | |
| Positive | | 113 (33.9%) | 276 (62.2%) | |  | |
| **HER-2** | |  |  | | <0.001 | |
| Negative | | 52 (15.6%) | 181 (40.8%) | |  | |
| Positive | | 237 (71.2%) | 263 (59.2%) | |  | |
| Unknown | | 44 (13.2%) | 0 (0.0%) | |  | |
| Abbreviations: PD: Paget's Disease; HR: hormone receptor; HER-2: human epidermal growth factor receptor-2; | | | | | | |
| (a): HR positive: ER (Estrogen Receptor) positive or/and PR (Progesterone Receptor) positive. | | | | | | |
| (b): Pearson Chi-square tests between PD Group in FUSCC and SEER. | | | | | | |
| (c): T tests were used to compare age between PD FUSCC Group And PD SEER Group. | | | | | | |

**Table S3.Clinicopathological characteristics of PD Patients and Matched Non-PD Patients.**

|  | PD-Patients | Matched Non-PD Patients |
| --- | --- | --- |
| Patient Characteristics | n=335 | n=1005 |
|  | No.(%) | No.(%) |
| **Age(year)** |  |  |
| <40 | 55 (16.42%) | 165 (16.42%) |
| ≥40 | 280 (83.58%) | 840 (83.58%) |
| **HR(a)** |  |  |
| Negative | 228 (68.06%) | 684 (68.06%） |
| Positive | 107 (31.94 %) | 321 (31.94%） |
| **Her-2** |  |  |
| Negative | 56 (16.72%) | 168 (16.72%） |
| Positive | 279 (83.28%) | 837 (83.28%) |
| **Tumor size(cm)** |  |  |
| <2 | 183 (54.63%) | 549 (54.63%) |
| ≥2 | 152 (45.37%) | 456 (45.37%) |
| **Lymph node metastasis** |  |  |
| no | 212 (63.28%) | 636 (63.28%) |
| yes | 123 (36.72) | 369 (36.72%) |
| Abbreviations: HR: hormone receptor; HER-2: human epidermal growth factor receptor-2; | | |
| (a): HR positive: ER (estrogen receptor) positive or/and PR (progesterone receptor) positive | | |
